# Supplementary material for: Predictive performance of the PUMA questionnaire as an opportunistic COPD case-finding tool in Singapore primary care
Source: Research Square preprint supplement (doi:10.21203/rs.3.rs-8394069/v1), 2025-12-31
Supplement: Supplementary file 1 [file c5c063ab31a3f07e37174698.docx]

**Supplementary** file **S1.**

**PUMA COPD screening tool** PUMA慢性阻塞性肺病评估工具

1. 性别 Gender

- Female 女
- Male 男

1. 年龄 Age

- 40-49 years old 40-49岁
- 50-59 years old 50-59岁
- 60 years old and above 60岁及以上

1. How many cigarettes have you smoked in your life? (If you have smoked less than 20 packets in a lifetime or less than 1 cigarette a day in one year, check “No”) (Calculation of pack-year = (Years of smoking × number of cigarettes per day) / 20)

您这辈子吸了多少烟？ （如果您一生中吸烟总数少于20包，或一年内每天吸烟不到1根，请选择“没吸多少”）（包-年数计算方法＝吸烟年数×每天吸烟根数/ 20）

- No 没吸多少，即少于20包或每天吸烟不到1根 (skip to question 6)
- Less than 20 pack-year 少于20包-年
- 20-30 pack-year 20-30 包-年
- More than 30 pack-year 超过30包-年

1. Average cigarettes per day平均每天吸烟的根数

_____ cigarettes 根

1. Number of years smoking吸烟的年数

_____ years 年

1. Do you feel short of breath at some point when you walk faster on flat ground or a small incline? 当您在平地或缓坡上快步走时，有时是否会感到呼吸急促？

- No 否
- Yes 是

1. Do you usually have phlegm coming from your lungs or difficulty expelling phlegm when not suffering a cold? 您是否在没有感冒的时候也会经常从肺里往外咳痰，或者咳痰有困难？

- No否
- Yes是

1. Do you usually have a cough when not suffering from a cold? 您是否在没有感冒的时候一般也会咳嗽？

- No 否
- Yes 是

1. **Before this study**, have you ever been asked by a doctor or other health professional to blow into a device (called a spirometer or peak flow meter) to know your lung function?

**在此研究之前**，是否曾有医生或者其他健康专业人士让您往一个装置（称为肺活量计或峰流速仪）里吹气，以检测您的肺功能？

- No 否
- Yes 是

**Supplementary** file **S2.**
